# Supplementary material
Source: PubMed Central journal article supplement (PMC7491604)
Supplement: NIHMS1578080-supplement-3.pdf [file NIHMS1578080-supplement-3.pdf]

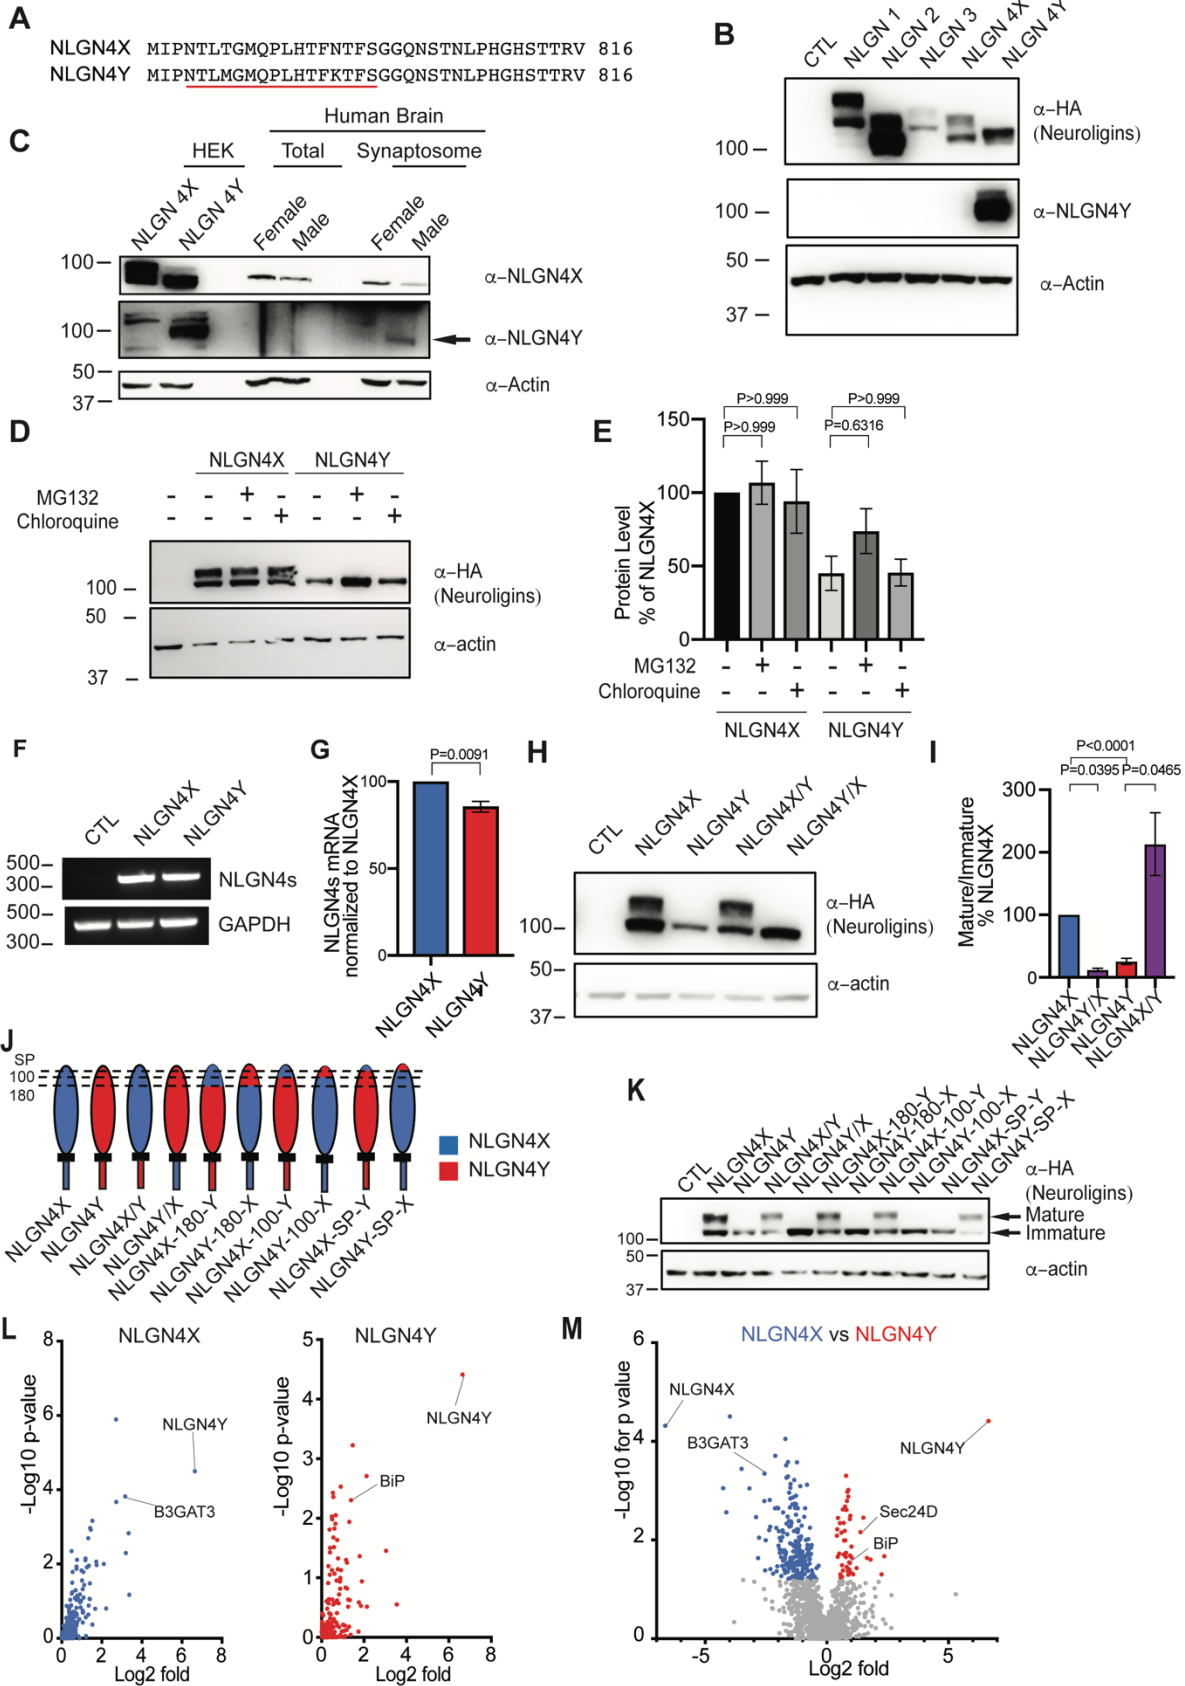

**Figure S1. Related to Figure 1 and 2. NLGN4Y is expressed in male brain and selectively binds to BiP**

**A.** Sequence alignment for the intracellular domain of NLGN4X and NLGN4Y. The NLGN4Y antibody epitope is underlined in red. **B.** Immunoblot of transfected HA-tagged NLGN 1, 2, 3, 4X, and 4Y. **C.** Immunoblot of male and female brain synaptosomal preps. **D.** NLGN4X and NLGN4Y expressed in HEK293T cells were treated with MG132 or chloroquine for 24 hours to examine protein degradation. Cells were lysed and protein level was determined by immunoblotting with HA-Ab. **E.** Protein level (means  $\pm$  S.E.M.) normalized to NLGN4X. P values were calculated by one-way ANOVA with Bonferroni's comparison test. (n=4). **F.** NLGN4X and NLGN4Y expression (319 bp) in transfected HEK293T cells. **G.** Expression level (means  $\pm$  S.E.M.) normalized to NLGN4X. P value was calculated by t-test. **H.** Immunoblot of HEK293T cells expressing NLGN4X, NLGN4Y, NLGN4X/Y, NLGN4Y/X. **I.** Ratio of mature/immature level (means  $\pm$  S.E.M.) normalized to NLGN4X or NLGN4Y. P values were calculated by ANOVA with Bonferroni's comparison test. (n=8). **J.** Schematic for domain swapping of NLGN4X and NLGN4Y. **K.** Immunoblot comparing chimeras of NLGN4X and NLGN4Y expressed in HEK293T cells. NLGN4X-100-4Y is sufficient to promote NLGN4Y maturation. **L.** Volcano plots of enrichment of protein interactors for NLGN4X or NLGN4Y referenced to HA beads. **M.** Volcano plot of protein interactor enrichment for NLGN4X vs NLGN4Y

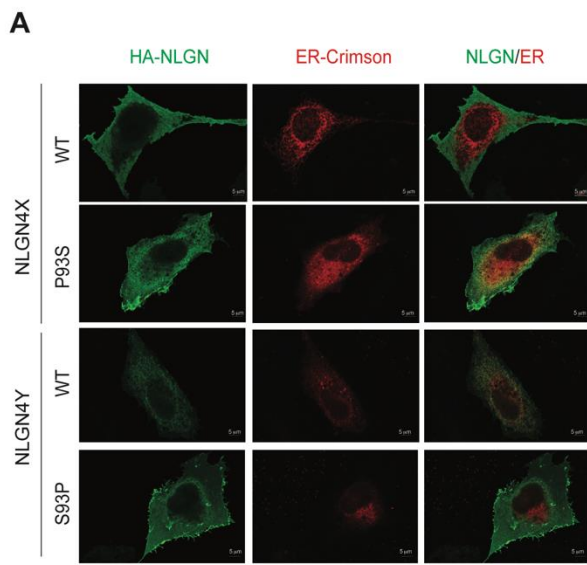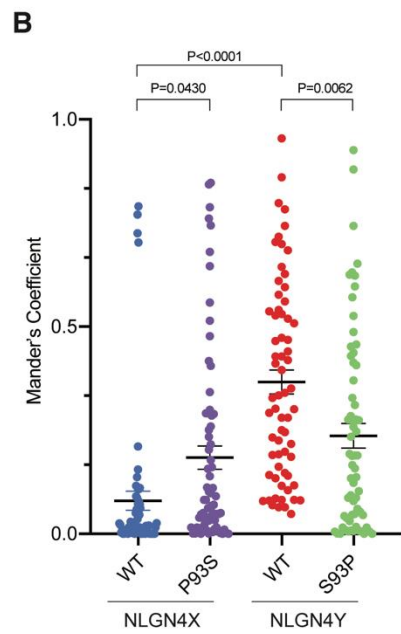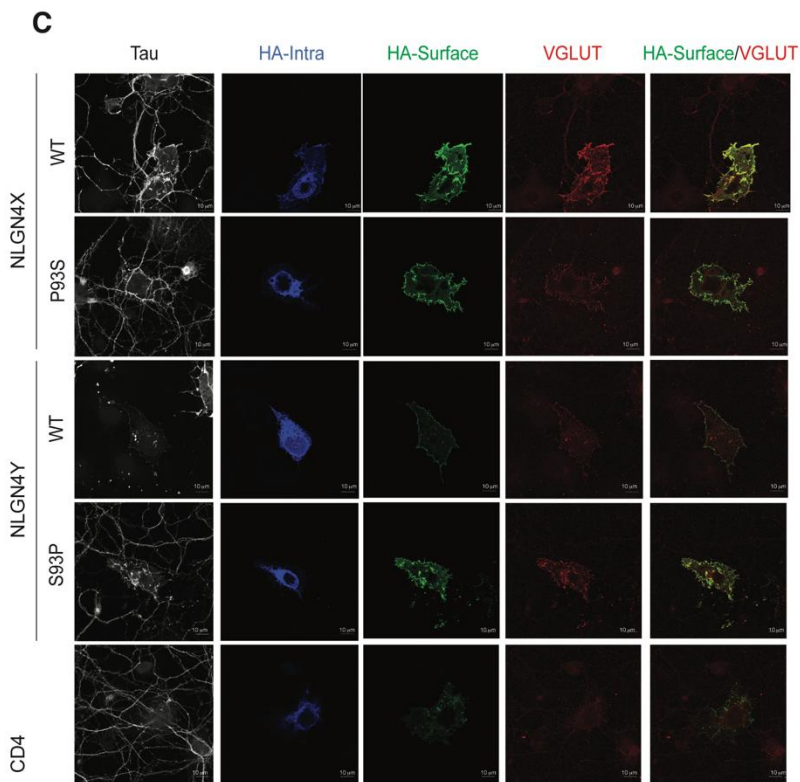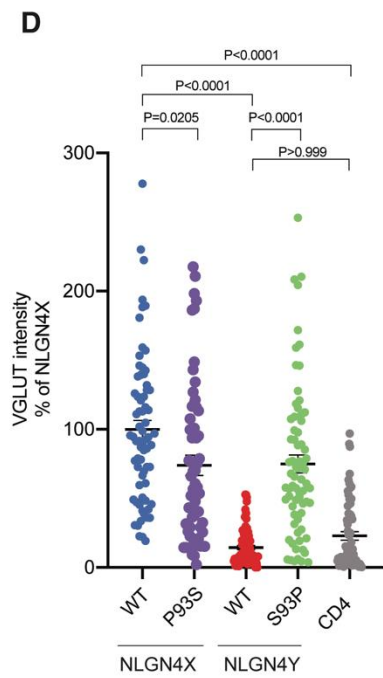

**Figure S2. Related to Figure 2 and 3. NLGN4Y localizes to ER thus inhibits it to induce synapses**

**A.** Cos-7 cells coexpressing NLGN4X (WT, P93S) or NLGN4Y (WT, S93P) with E2-Crimson, an ER marker. NLGN4X (WT, P93S) and NLGN4Y (WT, S93P) were labeled with anti-HA and Alexa 488-conjugated secondary (green). E2-Crimson fluorescent was excited using far-red laser (red) to label ER. DAPI was used to visualize the nucleus (blue). **B.** Manders Coefficient of NLGN4X (WT, P93S) or NLGN4Y (WT, S93P) with ER. P value was calculated by ANOVA with Bonferroni's (n=3). **C.** Cos-7 cells expressing NLGN4X (WT, P93S), NLGN4Y (WT, S93P), or CD4 were cocultured with rat hippocampal neurons. NLGN4X (WT, P93S), NLGN4Y (WT, S93P) were labeled with rat anti-HA and Alexa 555 -conjugated secondary (green) for surface expression, and with rabbit anti-HA and Alexa 488-conjugated secondary (blue) for intracellular expression. Endogenous tau and VGLUT were labeled with their respective antibody with Alexa 405-conjugated secondary for tau (white) and Alexa 647-conjugated secondary for VGLUT (red). **D.** VGLUT intensity levels (means  $\pm$  S.E.M.) were normalized to NLGN4X. P values were calculated by ANOVA with Bonferroni's comparison test.

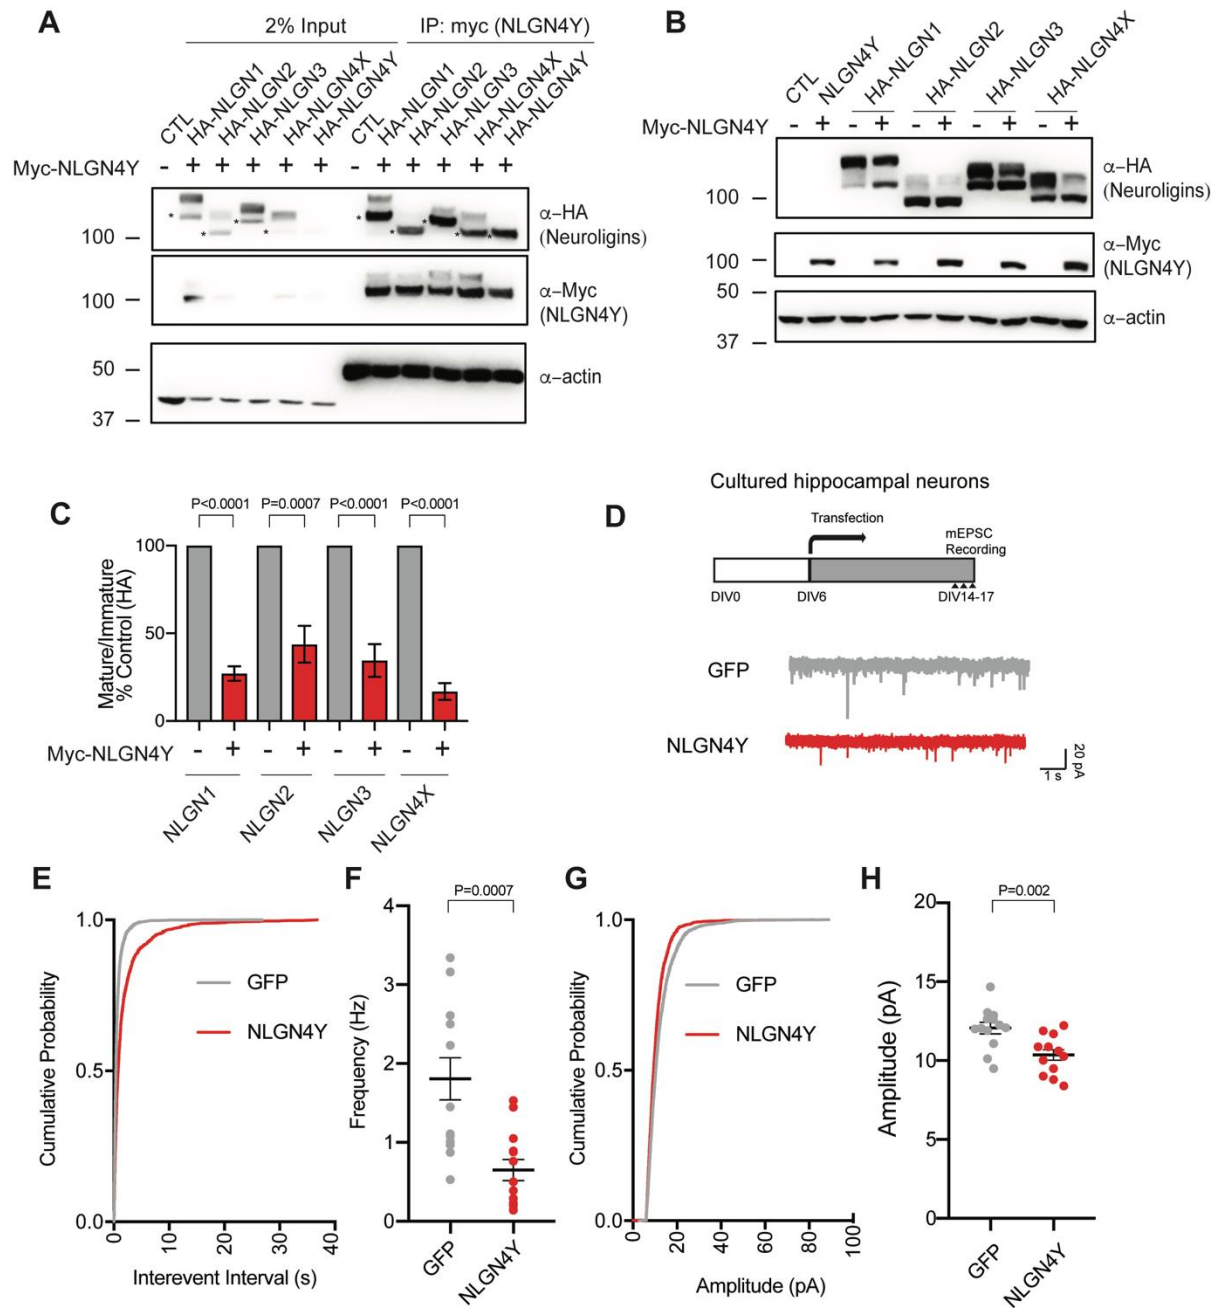

**Figure S3. Related to Figure 3. Heterodimerization with NLGN4Y decreases NLGN1, 2, 3, 4X maturation and synaptic strength**

**A.** HA-NLGN1, 2, 3, 4X, or 4Y were coexpressed with myc-NLGN4Y and then immunoprecipitated using Myc antibody. Immunoblot of HA-NLGN1, 2, 3, 4X, or 4Y from the immunoprecipitates. The immature bands are enriched in the immunoprecipitated fraction. **B.** Immunoblot of HA-NLGN1, 2, 3, or 4X coexpressed with Myc-NLGN4Y. **C.** Mature/immature HA-NLGNs level (means  $\pm$  S.E.M.) normalized to NLGN1, 2, 3, or 4X. P values were calculated using an unpaired *t* test. (n=6). **D.** Experimental design for recording, and representative mEPSC traces recorded in cultured hippocampal neurons expressing GFP or GFP with NLGN4Y. **E and F.** mEPSC frequency cumulative probability and mean. P values were calculated by t-test (n=3). **G and H.** mEPSC amplitude cumulative probability and mean. P values were calculated by t-test. (n=3)

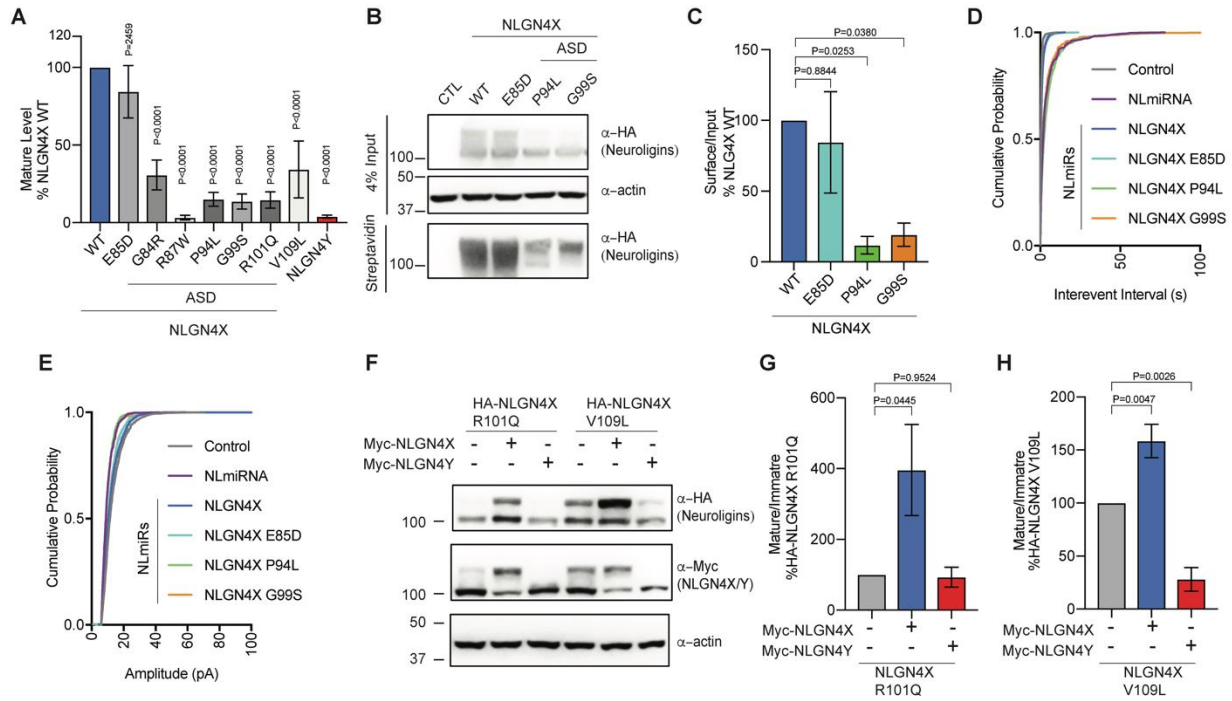

**Figure S4. Related to Figure 4. Decreased surface expression and synaptic transmission in NLGN4X ASD-associated mutations**

**A.** Mature band levels (means  $\pm$  S.E.M.) normalized to NLGN4X WT. P values were calculated by one-way ANOVA Bonferroni's comparison test. (n=4) **B.** Surface expression of NLGN4X (WT, E85D, P94L, or G99S) analyzed by immunoblotting isolated surface biotinylated proteins in transfected HEK293T cells. **C.** Surface expression level (means  $\pm$  S.E.M.) normalized to NLGN4X WT. P values were calculated using one-way ANOVA Bonferroni's comparison test. (n=3). **D and E.** Cumulative probability of spontaneous mEPSC frequency and amplitude. P values were calculated by one-way ANOVA Bonferroni's comparison test. (n=3). **F.** Immunoblot of HA-NLGN4X and NLGN4Y coexpressed with Myc-NLGN4X (R101Q or V109L). **G.** Ratio of mature/immature levels (means  $\pm$  S.E.M.) normalized to NLGN4X R101Q. **H.** Mature/immature level (means  $\pm$  S.E.M.) normalized to NLGN4X V109L. P values were calculated by one-way ANOVA Bonferroni's comparison test. (n=3)

| Variants                 | Inheritance Pattern | Sex  | Primary Phenotype                   | Additional Comments/Reference                                                                           |
|--------------------------|---------------------|------|-------------------------------------|---------------------------------------------------------------------------------------------------------|
| G84R                     | Maternal            | M    | ASD                                 | Asymptomatic mothers. (Xu <i>et al.</i> , 2014)                                                         |
| R87W                     | De novo             | M    | ASD                                 | (Zhang <i>et al.</i> , 2009)                                                                            |
| P94L                     | N/A                 | N/A  | n/a                                 | GeneDX submitted on ClinVar with unknown significant.                                                   |
| G99S                     | Maternal            | F    | ASD                                 | Mother also has learning disability. A brother also has learning disability. (Yan <i>et al.</i> , 2005) |
|                          |                     | M    | ASD                                 | Mother also has learning disability. Sibling of above. (Yan <i>et al.</i> , 2005)                       |
| R101Q                    | Maternal            | M    | ASD                                 | New variant from this manuscript                                                                        |
| V109L                    | Maternal            | M    | ID                                  | New variant from this manuscript                                                                        |
| Q162K                    | De novo             | F    | ASD                                 | (Xu <i>et al.</i> , 2014)                                                                               |
| L211X                    | N/A                 | N/A  | Anxiety,<br>ADHD,<br>Cerebral palsy | (Yuen <i>et al.</i> , 2017)                                                                             |
| Q274X                    | Maternal            | M    | ADHD                                | (Yuen <i>et al.</i> , 2017)                                                                             |
| A283T                    | Maternal            | M    | ASD                                 | (Xu <i>et al.</i> , 2014)                                                                               |
| Q329X                    | Maternal            | M    | ASD                                 | (Yu <i>et al.</i> , 2013)                                                                               |
| K378R                    | Maternal            | M    | ASD                                 | (Pampanos <i>et al.</i> , 2009)                                                                         |
|                          |                     | M    | ASD                                 | (Yan <i>et al.</i> , 2005)                                                                              |
| 396X frameshift<br>1186t | Maternal            | 2XM  | Asperger<br>Syndrome/ASD            | (Jamain <i>et al.</i> , 2003)                                                                           |
| V403M                    | Maternal            | M    | ASD                                 | have both affected and unaffected siblings.<br>(Xu <i>et al.</i> , 2014)                                |
| 429X<br>(nt1253del(AG))  | Maternal            | 13XM | ASD/ID                              | (Laumonnier <i>et al.</i> , 2004)                                                                       |
| V454_A457X               | De novo             | M    | ID                                  | (Mayo <i>et al.</i> , 2016)                                                                             |
| V522M                    | De novo             | N/A  | TD                                  | (Wang <i>et al.</i> , 2018)                                                                             |
| R704C                    | Maternal            | M    | ASD                                 | unaffected sister (+/-)                                                                                 |
| R766Q                    | Maternal            | M    | ASD                                 | (Yan <i>et al.</i> , 2005)                                                                              |



**Table S1. Related to Figure 4. NLGN4X-associated variants.** Variants found in NLGN4X in published literature are listed with inheritance pattern.
